# Supplementary material
Source: PubMed Central journal article supplement (PMC4771310)

**Figure S1. Bacterial genera and expressed enzymes involved in metabolism.**

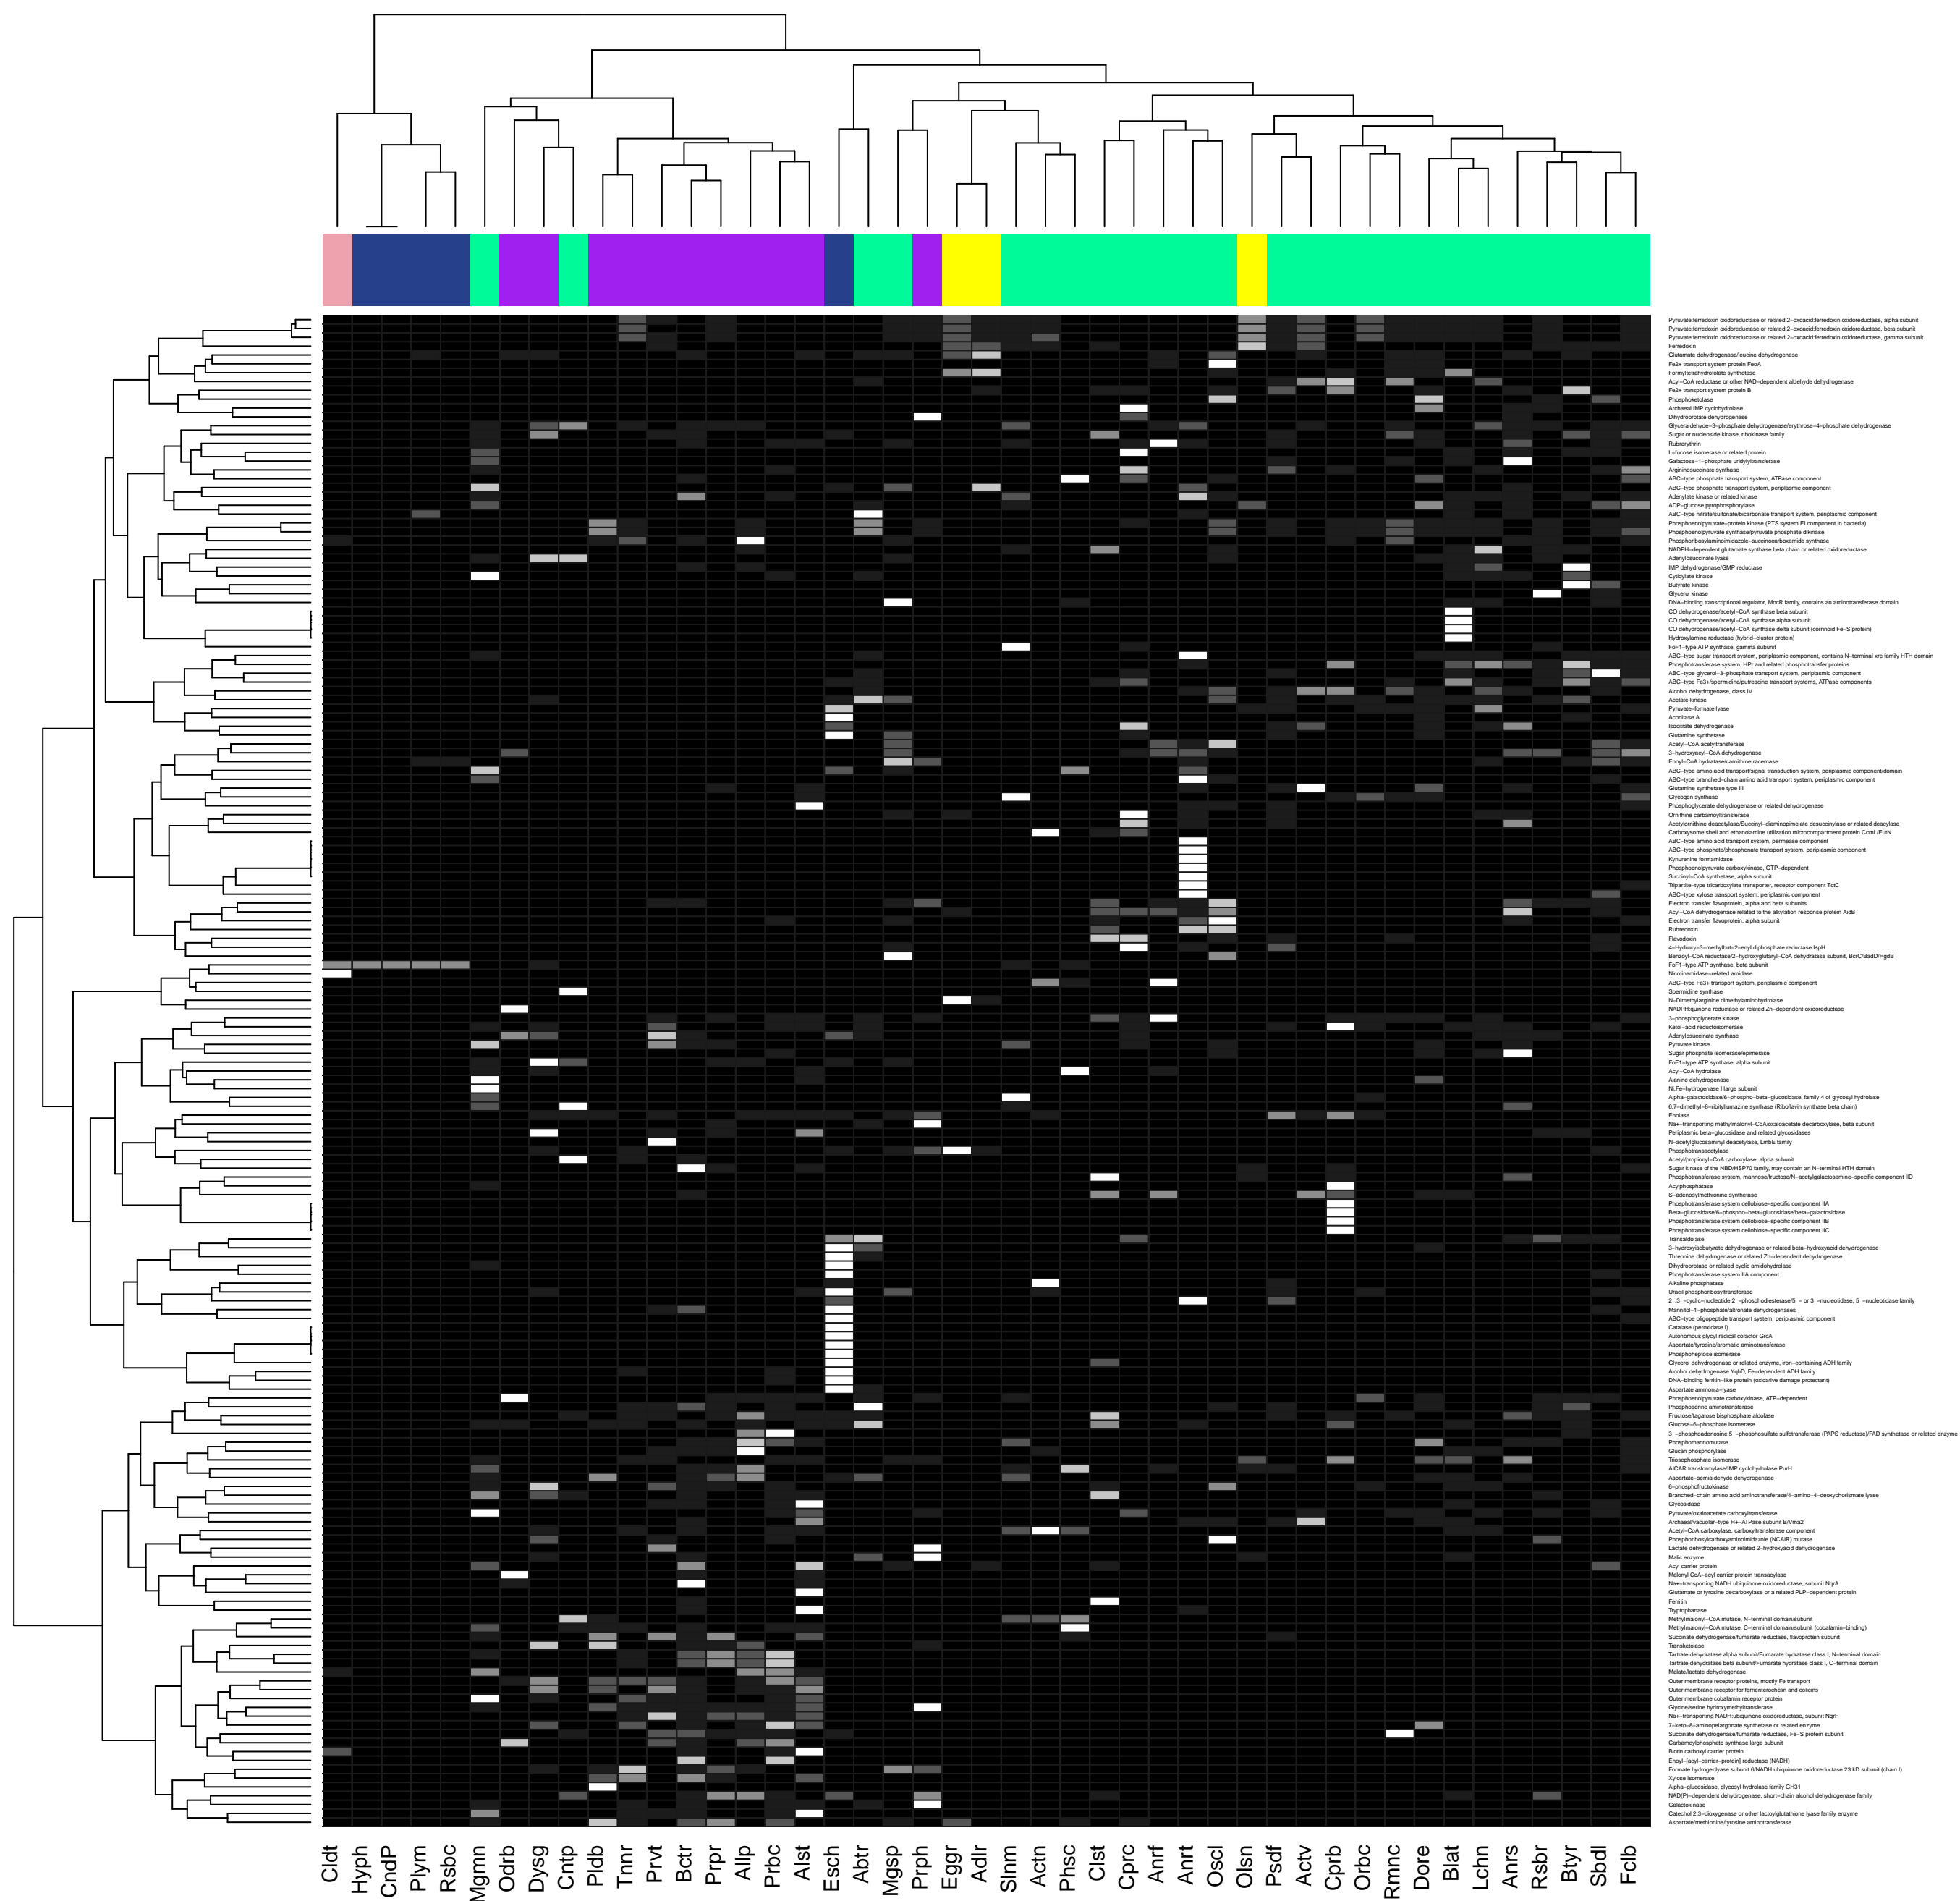

Supplement: AEM.03473-15_zam999116971so1.pdf [file AEM.03473-15_zam999116971so1.pdf]
